## Assessing and characterising the repertoire of constitutive promoter elements in soil metagenomic libraries in *Escherichia coli*

Cauã Antunes Westmann<sup>1</sup>, Luana de Fátima Alves<sup>2,3</sup>, Rafael Silva-Rocha<sup>1‡</sup> and María-Eugenia Guazzaroni<sup>2‡\*</sup>

<sup>1</sup> Department of Cellular and Molecular Biology, FMRP, University of São Paulo, Ribeirão Preto, SP Brazil

<sup>2</sup> Department of Biology, FFCLRP, University of São Paulo, Ribeirão Preto, SP Brazil

<sup>3</sup> Department of Biochemistry, FMRP, University of São Paulo, Ribeirão Preto, SP Brazil

‡These authors contributed equally to this work

\*Correspondence to:

María-Eugenia Guazzaroni  
Faculdade de Filosofia, Ciências e Letras de Ribeirão Preto, Universidade de São Paulo  
Av. Bandeirantes, 3.900. CEP: 14049-901.  
Ribeirão Preto, São Paulo, Brazil  
Tel.: +55 16 3315 3695; Fax: +55 16 3633 4886  
E-mail: [meguazzaroni@gmail.com](mailto:meguazzaroni@gmail.com)

## 1 SUMMARY

2 Although functional metagenomics has been widely employed for the discovery of genes relevant to biotechnology  
3 and biomedicine, its potential for assessing the diversity of transcriptional regulatory elements of microbial  
4 communities has remained poorly explored. Here, we have developed a novel framework for prospecting,  
5 characterising and estimating the accessibility of promoter sequences in metagenomic libraries by combining a bi-  
6 directional reporter vector, high-throughput fluorescence assays and predictive computational methods. Using the  
7 expression profiling of fluorescent clones from two independent libraries from soil samples, we directly analysed  
8 the regulatory dynamics of novel promoter elements, addressing the relationship between the “metaconstitutome”  
9 of a bacterial community and its environmental context. Through the construction and screening of plasmid-based  
10 metagenomic libraries followed by *in silico* analyses, we were able to provide both (i) a consensus exogenous  
11 promoter elements recognizable by *Escherichia coli* and (ii) an estimation of the accessible promoter sequences  
12 in a metagenomic library, which was close to 1% of the whole set of available promoters. The results presented  
13 here should provide new directions for the exploration through functional metagenomics of novel regulatory  
14 sequences in bacteria, which could expand the Synthetic Biology toolbox for novel biotechnological and biomedical  
15 applications.

16

## 17 INTRODUCTION

18 The study of prokaryotic transcriptional regulation is essential for understanding the molecular  
19 mechanisms underlying decision-making processes in microorganisms <sup>1</sup>, comprising populational (e.g. colony  
20 structure, quorum sensing detection), ecological (e.g. nutrient acquisition, biomass degradation) and pathogenic  
21 behaviours (e.g. host recognition, biofilm formation). The activity of most bacterial promoters is usually dependent  
22 on the combined action of transcription factors and sigma factors in response to multiple environmental stimuli <sup>2</sup>.  
23 For instance, in *Escherichia coli*, the compilation of decades of experimental data indicate that approximately 50%  
24 of its promoters are under the control of a single specific regulator, while all other genes are regulated by at least  
25 two transcription factors <sup>3</sup>. Moreover, the recent development of experimental and large-scale sequencing  
26 techniques, together with powerful computational approaches have allowed both the discovery of insightful

1 information about bacterial transcriptional systems and the development of novel approaches for studying those  
2 systems in higher depth <sup>4-7</sup>. However, despite technical innovations, most of the studies are still centred on the  
3 model organism *E. coli*, a single bacterial species among at least 30,000 other already sequenced <sup>8</sup>, in an estimated  
4 total of 1 trillion species <sup>9</sup>.

5 With the advent of Metagenomics <sup>10</sup>, the exploration of unculturable bacteria (approximately 99% of a  
6 bacterial community<sup>11</sup> widely expanded genomic information, providing resourceful data about populational  
7 structures and genetic diversity in a myriad of environmental samples <sup>12-14</sup>. Two main approaches are commonly  
8 adopted for those metagenomic studies <sup>15</sup>: the sequence-based metagenomic approach, which relies on massive  
9 sequencing of metagenomic DNA and powerful bioinformatics tools for extracting information from the  
10 metagenomic sequences; and functional metagenomics <sup>16,17</sup>, which directly explores the functionality of enzymes  
11 and other structural elements through a wide range of stress/substrate/product-based assays <sup>18-21</sup>. In this context,  
12 although a large number of genes/ORFs has been discovered through the previously described approaches, the  
13 detection of novel bacterial regulatory elements using high-throughput technologies has been poorly explored,  
14 presenting so far a single well-defined method for the discovery of substrate-inducible regulatory sequences -  
15 SIGEX - <sup>19</sup> and a limited assay for exploration of constitutive promoters <sup>22</sup>. This narrow range of methodologies is  
16 directly related to the biased functional search towards novel genes and to a lack of both experimental and  
17 computational tools for finding and validating promoter sequences in metagenomic libraries <sup>23</sup>.

18 Unravelling novel bacterial promoters is essential for understanding the regulatory diversity of  
19 microorganisms, addressing important questions, such as the abundance of both constitutive and inducible  
20 elements in a metagenomic library, the bottlenecks regarding host choices (i.e. the constraints limiting the diversity  
21 of exogenous regulatory sequences that can be recognized by different hosts) and the correlation between  
22 promoter strength, transcriptional noise and the functional role of the regulated gene/operon <sup>23-26</sup>. Furthermore,  
23 prospecting and characterising novel regulatory sequences is crucial for expanding the current Synthetic Biology  
24 toolbox and generating novel biotechnological applications. For instance, there is a high demand for novel  
25 constitutive and inducible promoters responding to process-specific parameters imposed by a wide variety of  
26 processes, such as industrial applications, heterologous protein expression and biosensors generation <sup>19,23,27-29</sup>.

1           In this context, the most common strategy for prospecting regulatory sequences is the usage of  
2    unidirectional promoter trap-vectors, which consist in transcriptional fusions between DNA fragments and a  
3    reporter gene. This method has been widely employed for assessing regulatory sequences in genomic DNA<sup>30-33</sup>,  
4    however its application in metagenomic DNA fragments has remained poorly explored<sup>19</sup>. The main constraint  
5    regarding the use of unidirectional systems is that bacterial genomes present a large variation in the percentage  
6    of their leading-strand genes, ranging from ~45% to ~90%<sup>34,35</sup>. Thus, a bi-directional promoter reporter system  
7    would be preferable, by increasing the probability of finding promoter sequences. In the present work, we have  
8    developed a novel strategy for in-depth prospection, characterisation, and quantification of accessible promoter  
9    elements from soil metagenomic samples in *E. coli* as a standard host.

10           Although both constitutive and inducible promoters were potentially detectable by this method, we have  
11    focused exclusively on the study of the former, as a proof of concept, by avoiding substrate-based induction assays  
12    as previously reported<sup>18-21</sup>. We have collected soil samples from two differentially biomass-enriched sites of a  
13    Secondary Atlantic Forest in South-eastern Brazil and generated metagenomic libraries in a bi-directional probe  
14    vector for primary screenings. We have characterised the expression behaviours of a large set of GFP<sub>I</sub>va  
15    expressing clones from both libraries and narrowed down our selection to 10 clones for an in-depth analysis  
16    regarding potential ORFs and endogenous promoters. By cross-validating *in silico* analyses and experimental data  
17    of predicted regulatory sequences, we have located and profiled the expression of 33 endogenous promoters  
18    within the selected clones (see Supplementary Table S2 online), providing resourceful information concerning the  
19    architecture and transcriptional dynamics of promoters from metagenomic fragments. Thus, in order to contribute  
20    to this set of accessible genetic features, we have used our gathered data to provide for the first time a direct  
21    estimation of the whole set of accessible constitutive promoters in a soil metagenomic library hosted in *E. coli*,  
22    which we have called the “metaconstitutome” of an environmental sample.

## 23    **RESULTS AND DISCUSSION**

### 24    **Generating metagenomic libraries and screening for fluorescent clones**

25           We have constructed and assessed two metagenomic libraries hosted in *E. coli* DH10B strain for the  
26    analysis of bacterial promoters in environmental samples (Figure 1). The libraries were generated from soil

1 microbial communities of two sites bearing differential tree litter composition (*Anadenanthera spp.* and *Phytolacca*  
2 *dioica*) within a Secondary Atlantic Forest zone at the University of Sao Paulo, Ribeirão Preto, Brazil. Both  
3 metagenomic DNA were cloned into the pMR1 bi-directional reporter vector, which has GFP<sub>Iva</sub> and mCherry  
4 reporter genes in opposite directions<sup>36</sup>. Each metagenomic library presented about 250 Mb of environmental DNA  
5 distributed into approximately 60.000 clones harbouring insert fragments size ranging from 1.5 Kb to 7 Kb, with an  
6 average size of 4.1 Kb (Table 1). We have chosen fragments of 1.5-7 Kb in order to validate our strategy on  
7 standard-sized functional metagenomic libraries based on plasmid vectors<sup>18,19,37-39</sup>. In total, 1,100 fluorescent  
8 clones, resulting in a rate of approximately one fluorescent clone every one hundred fifty clones (USP1) or every  
9 ninety clones screened (USP3), were manually selected under blue light exposition. Then, these fluorescent clones  
10 were directly recovered from LB agar plates supplemented with chloramphenicol. The direct screening was  
11 preferred over the use of metagenomic clone pools from stocks as it reduces the chances of both biased clone  
12 enrichment (e.g. clones with higher growth rates, usually clones bearing small inserts or without insert) and dilution  
13 of positive clones with impaired growth (e.g. clones with high expression of GFP and/or other exogenous genes),  
14 avoiding thus clonal amplification.

### 15 **Evaluating the expression dynamics of fluorescent clones**

16 In order to analyse the expression patterns of the isolated clones, we evaluated the intrinsic dynamics of  
17 GFP<sub>Iva</sub> and mCherry by randomly selecting 20 clones expressing each reporter (as schematically represented in  
18 Figure 1). As represented in Figures 2A-B, we found that clones expressing mCherry were not suitable for standard  
19 microplate 8 hour assays, as the fluorescence intensity values differed dramatically between 8 and 24 hours after  
20 the beginning of the experiment. The slow kinetics of mCherry expression has already been reported as a  
21 consequence of a two-step oxidation process for protein maturation when compared to the one-step maturation  
22 process found in GFP reporters<sup>40</sup>. On the other hand, the clones expressing GFP<sub>Iva</sub> presented the enhanced  
23 intrinsic properties for microplate assays, supported by the observation of very similar fluorescence intensities  
24 between the two time points tested. Furthermore, the GFP<sub>Iva</sub> has an LVA-degradation tag attached to its C-  
25 terminal, which reduces GFP accumulation and increases protein turnover, generating a more precise fluorescence  
26 output on analysis of expression patterns<sup>41</sup>.

1            Thus, 260 clones expressing GFP<sub>lva</sub> (160 clones from the USP1 library and 100 from USP3) were  
2 selected for further analysis of expression patterns on microplate reader assays with biological and technical  
3 triplicates. The dynamic profiles for each clone were converted into heat maps and hierarchically clustered by a  
4 Euclidean Distance algorithm into a dendrogram, concisely representing the expression patterns of each  
5 metagenomic library. In order to assess the diversity of promoter strengths among the generated metagenomics  
6 libraries, three previously characterized constitutive promoters (see Experimental Procedures for further  
7 information) positioned upstream a GFP<sub>lva</sub> reporter were used as standards for strong, medium and weak  
8 expression profiles (referred here as p100, p106 and p114, respectively). Considering both metagenomics libraries,  
9 we have found a total of 30 strong promoters showing a strength similar to the p100 control, 40 medium strength  
10 promoters similar to the p106 control, 60 weak promoters similar to the p114 control and a wide range of promoters  
11 with particular expression patterns which did not cluster with any of the previously mentioned positive controls  
12 (Figure 2C and Supplementary Fig. S1 online). Since the exploration of distinct expression behaviours is essential  
13 for expanding the current set of commercial promoters, the diversity of expression profiles highlighted in this study  
14 has supported the current framework as a promising strategy for finding novel promoters for downstream  
15 applications.

16            Furthermore, concerning the hierarchical organization of the expression profiles, the dendrogram of the  
17 USP3 library (Figure 2C) suggests the presence of at least four well-defined expression clusters comprising: (i)  
18 high, (ii) medium, (iii) low and (iv) very low expression profiles. A very similar pattern was identified in the  
19 expression dendrogram independently generated for the USP1 metagenomic library (see Supplementary Fig. S1  
20 online), suggesting those clusters might be depicting broader trends of organizational expression patterns in  
21 nature. Independent studies on microbial communities from aquatic environments have described similar patterns  
22 by evaluating gene expression through metatranscriptomic analysis<sup>42-45</sup>, indicating that our observations are not  
23 restricted to the assessed soil samples. However, further studies with a systematic application of the  
24 methodologies described here over a broader range of environmental samples would be required for evaluating  
25 these profiles.

26

27 ***In silico* analysis of DNA metagenomic fragments from selected clones**

1 From the 260 assessed samples, we have selected 10 clones displaying particular profiles (see  
2 Supplementary Fig. S2 online) depicting the diversity of expression behaviours found in both libraries. The inserts  
3 from selected clones were sequenced and analysed for both potential ORFs and RpoD-related promoter regions  
4 (-10 and -35 conserved regions). In the case of the identification of putative genes, twenty-nine ORFs with  
5 significant *E-values* (<0,001) were found (Table 2 and Supplementary Table S1 online) unevenly distributed  
6 between both DNA strands, in line with a lack of strong directional trends regarding bacterial genome organization  
7 <sup>46</sup>. The ORFs were also classified within a range of functional classes (delineated by MultiFun<sup>47</sup> and potential  
8 bacterial phyla (see Supplementary Fig. S3 online). For this, we carried out the analysis of the microorganisms  
9 associated with the closest similar protein of the identified ORFs (Table 2). The most abundant ORFs were related  
10 to unknown functions (31%) and metabolism (31%), followed by stress adaptation cell processes (17%) (see  
11 Supplementary Table S1 online), while the most abundant phyla related to the recovered ORFs were  
12 Proteobacteria (35%), followed by Bacteroidetes (22%) and Chloroflexi (14%) (see Supplementary Fig. S3 online).  
13 The relative abundance of the guanine-cytosine content of each insert was also assessed (Table 2), resulting in a  
14 median of 54%, varying from 43% to 61%, indicating their diverse phylogenetic affiliation. These results are in  
15 agreement with previous G-C content diversity analyses of soil samples which ranged from 50% to 61% <sup>48-50</sup>. Even  
16 with a limited sample size when compared to NGS-based metagenomic studies, the abundance of gene functions  
17 and bacterial groups predicted in this work was similar to the ones found in previous studies in soil microbial  
18 communities <sup>51-53</sup>. Considering the above, these results suggest that different bacterial groups could be the sources  
19 of accessible promoters in *E. coli*, that is, regulatory sequences recognizable by the molecular transcriptional  
20 machinery of *E. coli* that allowed the expression of the reporter genes.

21 The *in silico* promoter prediction has also provided relevant information concerning the potential number  
22 of regulatory regions on each selected fragment. The BPROM software <sup>54</sup> has been extensively employed in other  
23 promoter prediction studies and is based on the analysis of the -35 and -10 consensus sequence of RpoD  
24 promoters. The main sigma subunit, sigma-70 encoded by *rpoD*, plays a major role in transcription of growth-  
25 related genes, the so-called housekeeping genes <sup>55-57</sup>. From the *in silico* analysis, a total of 140 promoters were  
26 predicted among the 10 selected clones, suggesting an average of 5 RpoD-related promoters/Kb. This led us  
27 reasoning that most of the expression profiles previously described (Figure 2C and Supplementary Figure S1

1 online) were representing the dynamics of the merged promoters present in the metagenomic fragment.  
2 Considering that, we delineate a strategy to experimentally assess the number and location of accessible  
3 promoters from our selected clones, contrasting experimental results with *in silico* data.

#### 4 **Experimental identification, characterisation, and cross-validation of promoter regions**

5 In order to explore the potential set of accessible promoter regions from our metagenomic libraries, we  
6 developed a small DNA insert library generation approach (Figure 1). Firstly, the plasmids from the previously 10  
7 selected clones (original clones) were pooled together for insert amplification in a single PCR reaction. The  
8 resulting amplicons were fragmented by Sau3AI digestion and DNA fragments ranging from 0.2 Kb to 0.5 Kb were  
9 selected for subsequent cloning into the pMR1 vector. The generation of this sub-fragment library allowed the  
10 screening for both red and green fluorescent colonies as they would represent the accessible set of promoters  
11 among the metagenomic DNA fragments studied. It is important to highlight that as the cloning process was not  
12 directed, small fragments bearing promoter regions had a 50% chance of getting cloned in any direction, thus  
13 clones expressing mCherry were also isolated for subsequent sequencing. A total of 100 clones coming from the  
14 small DNA insert library (80 expressing GFP<sub>Iva</sub> and 20 expressing mCherry) were sequenced and then align  
15 against the original metagenomic fragments. As a result, we have identified at least 33 promoter regions within the  
16 initial set of the selected metagenomic clones (Figure 3, Supplementary Fig. S4 and Supplementary Table S2  
17 online). These findings showed that the *in silico* prediction of 140 RpoD-related promoters was overestimated in  
18 comparison with the experimental results. The above can be explained since prediction algorithms usually  
19 misrepresent nature by underestimating or overestimating results due to a lack of information regarding diversity  
20 and variability of natural *cis*-regulatory sequences<sup>58-60</sup>.

21 Additionally, the current experimental approach allowed us not only to identify novel promoter regions but  
22 also to determine promoter directionality. The evaluation of promoter localization within the 10 selected clones  
23 revealed that from the 33 experimentally selected small fragments, 7 (21%) were considered intragenic promoters  
24 while the remaining 79% (26 promoters) were considered primary promoters, defined as the furthest upstream  
25 promoter in a gene/operon<sup>61</sup>. This small-scale analysis slightly diverges from architectural features found in *E. coli*  
26 K-12 genome in which the promoter dataset was dominated by primary promoters (66.3%), with a lower number  
27 of secondary promoters (19.6%), defined as intergenic and downstream of primary promoters<sup>61</sup>, internal promoters



1 that are intragenic (9.8%), and antisense (4.2%) promoters<sup>61,62</sup>. This observation might reflect the diversity of  
2 genomic architectures in metagenomic libraries and highlight the current underestimation of bacterial intragenic  
3 promoters, which doubled the number in comparison to *E. coli*.

4         Based on the alignment results, we selected a defined set of small fragment clones related to each original  
5 sequence for dynamic expression profiling on a microplate reader. The results showed that for each set of small-  
6 fragments belonging to a DNA metagenomic clone, there was at least one with an expression pattern  
7 corresponding to the original clone previously observed (Figure 3 and Supplementary Fig. S4). Similarly, we  
8 identified other clones bearing small-inserts with individual profiles different to the primarily observed, representing  
9 alternative promoter regions in the original sequence that were not mapped in the initial approach (Figure 3). The  
10 diversity of the promoter expression profiles found in a single original metagenomic clone has a multifactorial  
11 nature, ruled by different processes. Firstly, it should be considered the inherent relationship between the  
12 regulatory dynamics and the functional role of the regulated gene<sup>26</sup>. Secondly, the transcriptional bias imposed by  
13 the *E. coli* molecular machinery, which would recognize orthologous sequences, but not necessarily reproduce the  
14 original behaviours found in natural hosts<sup>23,39,63,64</sup>. Finally, another point to be considered is that the increase in  
15 expression levels can be the result of the artificial juxtaposition of the promoter to the fluorescent reporter ribosome  
16 binding site, as a consequence of the cloning process.

17         Regarding *in silico* cross-validation, from the 33 experimentally validated promoters, 23 RpoD-related  
18 promoters (70%) were supported by the algorithmic analysis as they were aligned to their respective original  
19 sequences (Figure 3). On the other hand, the remaining 10 sequences (30%) were considered as promoters  
20 exclusively identified by experimental approaches. We hypothesized that these sequences could be either  
21 recognized by other sigma factors than sigma70 or presented unusual consensus sequences for -10 and -35 boxes  
22 which has bypassed the algorithmic analysis. However, experimental validation in *E. coli* strains lacking diverse  
23 sigma factors genes should be necessary for a more accurate conclusion.

24         Finally, sequences of the above experimentally validated promoters were characterised accordingly to  
25 previous studies reported in the literature. For this, we adopted an *in silico* classification proposed by Shimada et  
26 al<sup>65</sup> (2014), in which constitutive promoters present a high-level conservation of the consensus sequence for the  
27 major sigma factor RpoD, that is, the elements TTGACA (-35) and TATAAT (-10) separated by approximately 17

1 bp (Figure 4A and B). Constitutive promoters are defined as promoters active *in vivo* in all circumstances, and, on  
2 the other hand, inducible promoters are switched ON and OFF by transcription factors depending on the *in vivo*  
3 conditions <sup>65</sup>. The Logo pattern <sup>66</sup> generated from the alignment of the 33 identified metagenomic promoters (Figure  
4 4C) indicated that positions -35 and -34 (-35 box) and positions -8, -7 and -3 (-10 box) were highly conserved.  
5 Although this logo pattern was distant from the proposed for the RpoD-dependent constitutive promoters identified  
6 *in vitro* (Figure 4A <sup>65</sup>), was very similar to previously described consensus <sup>67</sup> from experimentally validated promoter  
7 sets from RegulonDB <sup>3</sup> and EcoCyc <sup>68</sup> databases (Figure 4B). To conclude, the results presented here has allowed  
8 us to identify a consensus for exogenous promoter recognition in *E. coli*, which can be an important resource for  
9 defining host-dependent restrictions in functional metagenomics.

## 10 **Estimating the accessibility of promoters in random metagenomic libraries**

11 In the present work we provide, for the first time in literature, a quantitative estimation regarding the  
12 accessibility of natural promoters in random metagenomic libraries, supported by the integration of both *in silico*  
13 and experimental results. We have estimated the existence of at least 553,300 promoters virtually recognized by  
14 *E. coli* in a standard functional soil metagenomic library, from which approximately 4,961 promoters (~1%) were  
15 readily accessible by our methodologies (see Experimental Procedures for calculations details). For the sake of  
16 comparison, we have estimated an average rate of 1.1 promoters/Kb potentially recognizable by *E. coli* host in our  
17 metagenomic fragments, which seems reasonable when compared to the rate of reported promoters in the well-  
18 studied genome of *E. coli* K-12, ranging from 0.5 to 2.7 promoters/Kb, depending on both chosen datasets and *in*  
19 *silico* prediction parameters <sup>61,62,65,69</sup>. We have also assessed the genomic features from 24 bacterial species  
20 catalogued on the DOOR2 database (Database of prOkaryotic OpeRons) <sup>70</sup> for a broader promoter rate estimation,  
21 resulting in 2 promoters/Kb, which is also in concordance to our estimation and to others reported in literature  
22 <sup>61,62,65,69</sup>. It should be mentioned that the average promoter rate from the present study (1.1 promoters/Kb) is  
23 probably an underestimation of the whole set available as it is restricted to clones expressing GFP under specific  
24 experimental conditions. Consequently, modifications of laboratory conditions during the screenings (such as  
25 growth-phase, temperature, exposure to different chemicals and substrates, to cite some) would probably reveal  
26 novel promoter elements <sup>71</sup>.

1           A seminal study in functional metagenomics provided by Gabor *et al*<sup>63</sup>(2004) estimated on a theoretical  
2 basis, using 32 prokaryotic genomes, that 40% of the enzymatic activities present in a soil metagenomic library  
3 could be readily accessed using *E. coli* as a host in an independent gene expression mode (in which both the  
4 promoter and the ribosome binding sites (RBS) are provided by the metagenomics insert). Moreover, it was  
5 predicted that Firmicutes, instead of Proteobacteria, would present the largest fraction of independently expressible  
6 genes (73%). Contrastingly, recent empirical studies on *E. coli* and other hosts have shown that functional  
7 expression faces a myriad of challenges that were not taken into account in previous mathematical models, such  
8 as codon usage, improper promoter and RBS recognition<sup>72</sup>, missing initiation factors, protein misfolding, missing  
9 co-factors, breakdown of product; improper secretion of product, toxicity of product or intermediates and formation  
10 of inclusion bodies<sup>24,25</sup>. Since it is impossible to predict the effect of the previously described difficulties in unknown  
11 metagenomic fragments, the actual fraction of genes that can be successfully expressed in *E. coli* is probably  
12 significantly lower than the proposed by Gabor and collaborators<sup>63</sup> (2004). In this context, our work supports the  
13 previous arguments<sup>24,25</sup> highlighting the large gap between theoretical predictions and experimental data as we  
14 have shown only a small portion of the whole set of promoters is accessible for *E. coli* in metagenomics libraries  
15 (~1%). Thus, we stress the importance of feeding mathematical models with empirical data in a continuous iterative  
16 process for improving its predictive power.

## 17 **CONCLUSIONS**

18           In summary, we have developed a novel methodology for prospecting, characterising and estimating the  
19 accessibility of promoter sequences in metagenomic samples by combining experimental and *in silico* approaches.  
20 The expression profiling of fluorescent clones was used for the first time as a direct approach to analyse the  
21 regulatory dynamics of an environmental sample, bearing great potential for revealing insightful trends regarding  
22 the transcriptional diversity of microbial communities. It has already been computationally demonstrated by  
23 Fernandez *et al.* (2014)<sup>73</sup> that the microbial metaregulome – the whole set of regulons of an environmental sample  
24 – is shaped by the physicochemical conditions of the environment as an adaptive process. Thus, future studies  
25 systematically applying our methodology to a range of environmental samples will greatly contribute to  
26 understanding this relationship between regulatory diversity and environmental adaptation in bacteria. At the same

1 time, it can also be further applied to the design of efficient microbial communities for therapeutic or ecological  
2 needs <sup>73–76</sup>.

3 Through the generation of a small-DNA insert library approach combined to *in silico* promoter prediction  
4 we were able to provide both (i) a consensus of recognizable exogenous regulatory sequences in an *E. coli* host  
5 and (ii) an estimation of the accessible promoter sequences in a plasmid-based functional metagenomic library,  
6 which was close to 1% of the whole set of available promoters. These are resourceful data for building a concise  
7 framework regarding the accessibility of genetic features from metagenomic libraries and how it can be influenced  
8 by the choice of different microbial hosts <sup>23,63,64</sup> or by the tinkering of the host's transcription systems <sup>72,77,78</sup>.

9 Although this work provided seminal information regarding promoter accessibility in metagenomics  
10 libraries, further high-throughput studies optimizing the proposed methods (e.g. application of automated screening  
11 methods; exploration of the whole set of fluorescent clones in a metagenomics library by Next-Generation-  
12 Sequencing) will be essential for expanding our current estimation into a more holistic landscape. Finally, we  
13 highlight that besides providing novel approaches for studying the regulatory diversity underlying environmental  
14 microbial communities, this work should be extremely useful for expanding the current Synthetic Biology toolbox  
15 through the discovery and characterisation of novel regulatory features.

16

## 17 **EXPERIMENTAL PROCEDURES**

### 18 **Bacterial strains, primers, plasmids and general growth conditions**

19 *E. coli* DH10B (Invitrogen) cells were used for cloning and experimental procedures. *E. coli* strains were routinely  
20 grown at 37°C in Luria-Broth medium or M9 minimal medium <sup>79</sup> (6.4 g/L Na<sub>2</sub>HPO<sub>4</sub>·7H<sub>2</sub>O, 1.5 g/L KH<sub>2</sub>PO<sub>4</sub>, 0.25  
21 g/L NaCl, and 0.5 g/L NH<sub>4</sub>Cl) supplemented with 2 mM MgSO<sub>4</sub>, 0.1 mM casamino acid, and 1% glycerol as the  
22 sole carbon source. When required, chloramphenicol (Cm) (34 µg/mL) was added to the medium to ensure plasmid  
23 retention. When cells were grown in minimal medium, antibiotics were used at half concentrations. Transformed  
24 bacteria were recovered on LB (Luria–Bertani) liquid medium for 1 hour at 37°C and 180 r.p.m, followed by plating  
25 on LB-agar plates at 37°C for at least 18 hours. All constructions were cloned into the pMR1 bi-directional-reporter  
26 vector <sup>36</sup>, which carries mCherry and GFP<sub>Iva</sub>, a short-lived variant of GFP.

## 1 **Metagenomic libraries construction and screening for fluorescent clones**

2 The metagenomic libraries used in this work were generated in our laboratory from two soil samples of a Secondary  
3 Atlantic Forest at the University of Sao Paulo, Ribeirão Preto, Brazil. Each sample was differentially enriched  
4 regarding tree species abundance on plant-litter composition: (i) enriched in leaves from *Phytolacca dioica* and (ii)  
5 from *Anadenanthera spp.* DNA was extracted from soil samples using the UltraClean™ Soil DNA isolation Kit (Mo  
6 Bio Laboratories, Solana Beach, CA, USA). For the construction of the libraries, metagenomic DNA was partially  
7 digested using Sau3AI, and fragments from 1.5 kb to 7 kb were extracted from an agarose gel for ligation into the  
8 dephosphorylated and BamHI-digested pMR1 vector. Ligation mixtures were transformed by electroporation into  
9 *E. coli* DH10B cells. To amplify the libraries, they were grown on LB agar plates containing Cm and incubated for  
10 18 h at 37°C. Both green and red clones were manually isolated from LB-agar plates exposed to blue light  
11 wavelength (at approximately 470 nm) by a transilluminator (Safe Imager™ 2.0 Blue Light Transilluminator). Ten  
12 fluorescent and twenty non-fluorescent clones were randomly picked from each library and had their plasmids  
13 extracted, following digestion with EcoRI and SmaI enzymes for checking presence/absence of inserts and their  
14 sizes. Cells from the same library were collected and pooled together in LB supplemented with 10% (wt/vol)  
15 glycerol for storing at -80°C. The plasmids from the 10 selected clones were isolated from individual clones and  
16 transformed into new *E. coli* DH10B cells to reconfirm expression patterns.

## 17 **Nucleic acid techniques**

18 DNA preparation, digestion with restriction enzymes, analysis by agarose gel electrophoresis, isolation of DNA  
19 fragments, ligations, and transformations were done by standard procedures (Ausubel et al., 1994). Plasmid DNA  
20 was sequenced on both strands by primer walking using the ABI PRISM Dye Terminator Cycle Sequencing Ready  
21 Reaction kit (PerkinElmer) and an ABI PRISM 377 sequencer (Perkin-Elmer) according to the manufacturer's  
22 instructions.

## 23 **GFP fluorescence assay and data processing**

24 To measure promoter activity, freshly plated single colonies were grown overnight in M9 medium supplemented  
25 with required antibiotics. Samples were diluted 1:20 (v/v) in M9 medium for a final volume of 200uL in 96-well  
26 microplates. Cell growth and GFP fluorescence were quantified using a Victor X3 plate reader (PerkinElmer,

1 Waltham, MA, USA). Promoter activities were expressed as the emission of fluorescence at 535 nm upon excitation  
2 with 485 nm light and then normalised with the optical density at each point (reported as fluorescence/OD600)  
3 after background correction. Background signal was evaluated with non-inoculated M9 medium and used as a  
4 blank for adjusting the baseline of measurements. *E. coli* DH10B harbouring the pMR1 empty plasmid was used  
5 as a negative control. Three different positive controls were used, consisting in *E. coli* DH10B harbouring pMR1  
6 plasmid with one of the following synthetic constitutive promoters from the iGEM BBa\_J23104 Anderson's  
7 catalogue (<http://parts.igem.org/Promoters/Catalog/Anderson>)<sup>80</sup> upstream a GFP<sub>Iva</sub> reporter: J23100, J23106 and  
8 J23114 (referred here as p100, p106 and p114, respectively). Unless otherwise indicated, measurements were  
9 taken at 30 min intervals over 8 h. All experiments were performed with both technical and biological replicates,  
10 being biological triplicates evaluated as independent measurements on different dates. Raw data were processed  
11 and plots were constructed using Microsoft Excel. All data was normalised by background values and transformed  
12 to a log<sub>2</sub> scale for better data visualisation. Heatmap dendrograms with expression profiles were generated by  
13 using MeV2 (<http://mev.tm4.org/>) software.

#### 14 **Small-DNA inserts libraries generation and screening**

15 In order to experimentally find and validate the promoter regions from each of the ten selected metagenomic  
16 clones, an experimental technique was developed based on the previously described methodology of  
17 metagenomic library construction. All selected clones had their plasmids extracted and pooled together in an  
18 equimolar ratio. The pooled sample was amplified through a single PCR reaction using high-fidelity polymerase  
19 enzyme (Phusion) and previously described primers flanking the MCS region (Multiple Cloning Site) of the pMR1  
20 vector, into which the metagenomic inserts were cloned. The resulting amplicons were firstly submitted to an  
21 analytical digestion followed by electrophoretic analysis for finding the optimal concentration of Sau3AI enzyme for  
22 obtaining fragments size ranging from 0.1Kb to 0.5Kb. Then, the purified pooled samples were fragmented by  
23 Sau3AI in preparative digestion and thereafter punctured from a 1% agarose gel in the region between 0.1 Kb and  
24 0.5 Kb. These small DNA fragments, in turn, were ligated to pMR1 vector. Aliquots of electrocompetent *E. coli*  
25 DH10B cells were transformed with ligated DNA. A total of 100 fluorescent clones (80 expressing GFP and 20  
26 expressing mCherry) were isolated under blue light excitation screening and had their plasmids extracted for

1 sequencing reactions. Fluorescent clones were stored at -80°C in LB medium supplemented with required  
2 antibiotics and 10% glycerol (v/v).

### 3 ***In silico* analysis of ORFs and promoter regions**

4 The inserts of selected clones were sequenced on both strands as previously described. Sequences were manually  
5 assembled for the generation of 10 contigs. Putative ORFs were identified and analysed using the online ORF  
6 Finder platform, available at the NCBI website (<http://www.ncbi.nlm.nih.gov/gorf/gorf.html>). Comparisons of  
7 nucleotide and transcribed amino acid sequences were performed against public databases (NCBI) using BlastN,  
8 BlastX and BlastP (BLAST, basic local alignment search tool) at the NCBI on-line server. For translation to protein  
9 sequences, the bacterial code was selected, allowing ATG, GTG, and TTG as alternative start codons. All the  
10 predicted ORFs longer than 270 bp were translated and used as queries in BlastP. Sequences with significant  
11 matches were further analysed with psiBlast, and their putative function was annotated based on their similarities  
12 to sequences in the COG (Clusters of Orthologous Groups) and Pfam (Protein Families) databases. Predicted  
13 general cellular functions were annotated only for known ORFs based on the MultiFam classification (Serres et al,  
14 2006). All sequences with an E-value higher than 0.001 in the BlastP searches and longer than 300 bp were  
15 considered to be unknown. Transmembrane helices were predicted with TMprep ([http://www.ch.  
16 embnet.org/software/TMPRED\\_form.html](http://www.ch.embnet.org/software/TMPRED_form.html)) and signal peptides with Signal P3.0 server ([http://www.cbs.  
17 dtu.dk/services/SignalP/](http://www.cbs.dtu.dk/services/SignalP/)). A complete table can be found at Supplementary Table S1 online. Promoter prediction  
18 was based on the analysis of the ten contigs by using both BPROM  
19 (<http://www.softberry.com/berry.phtml?topic=bprom&group=programs&subgroup=gfindb>) and bTSSfinder  
20 (<http://www.cbrc.kaust.edu.sa/btssfinder/>) web-based platforms. Both methods searched for rpoD-related  
21 sequences and we have only considered as valid predictions the ones matched on both approaches. Those filtered  
22 sequences were used to cross-validate 23 out of 33 experimentally defined regulatory regions by comparing the  
23 positions between predicted and experimental sequences in metagenomic fragments. The positions of the 33 small  
24 DNA fragments were obtained by a multiple alignment of the original contigs (queries) against those selected  
25 sequences, which has also allowed the validation of the promoter's directionality – forward or reverse - by observing  
26 the matched strands (Plus/Plus or Plus/Minus). The consensus Logo sequence was based on the alignment of the  
27 33 experimentally validated promoters, using the WebLogo platform (<http://weblogo.berkeley.edu/logo.cgi>).

## 1 **Calculations for promoter/Kb rates from databases and for promoter accessibility estimation**

2 Data from predicted sequences of promoter sites, TSS (Transcriptional Start Site) and TUs (Transcription Unit)  
3 reported in different studies and databases regarding *E. coli* and other bacteria <sup>3,61,65,70</sup> were used as proxies for  
4 the total number of predicted promoters. Those values were divided by their respective genome sizes (or average  
5 genome sizes when calculating an average rate of multiple species at once) in order to provide promoter/Kb rates  
6 (i.e. 8,000 predicted promoters, TSS or TUs on a genome of 4.6 Mb would result in a rate of 1.7 promoters/Kb). The  
7 promoter accessibility estimation followed the same rationale and was based on the combination of the data from  
8 both metagenomics libraries presented in Table 1 and the rate of experimentally discovered promoters per Kb (33  
9 promoters found in 30 Kb of metagenomic DNA, resulting in a rate of 1.1 promoters/Kb). Firstly, we have merged  
10 data from both metagenomic libraries and calculated the predicted number of promoters in a metagenomics library  
11 with an effective size of 503 Mb (combined effective sizes of USP1 and USP3) – the “effective size” takes into  
12 account only the percentage of clones with an insert -. Thus, we have multiplied the effective library size by the  
13 23previously obtained promoter rate (1.1 promoters/Kb), resulting in a total estimated set of 553,300 promoter  
14 sequences. Secondly, we have calculated the predicted set of accessible promoters by multiplying the number of  
15 fluorescent clones (1,100 clones, considering both libraries) by the average insert size (4.1 Kb) and by the rate of  
16 observed promoters per Kb (1.1 promoters/Kb), resulting in 4,961 potentially accessible promoters. Lastly, we have  
17 calculated the proportion of accessible promoters among the total number of predicted promoters, which  
18 represents approximately ~1% of the whole available set.

19

## 20 **Data Availability**

21 The nucleotide sequences obtained for the plasmid inserts have been deposited in the GenBank database under  
22 the Accession numbers (KY939589-KY939597), which are also shown in Table 2.

23

## 24 **REFERENCES:**

25 1. Ishihama, A. Prokaryotic genome regulation: Multifactor promoters, multitarget regulators and hierarchic  
26 networks. *FEMS Microbiol. Rev.* **34**, 628–645 (2010).



- 1 2. Browning, D. F. & Busby, S. J. W. Local and global regulation of transcription initiation in bacteria. *Nat. Rev. Microbiol.* **14**, 638–650 (2016).
- 3 3. Gama-Castro, S. *et al.* RegulonDB version 9.0: high-level integration of gene regulation, coexpression, motif clustering and beyond. *Nucleic Acids Res.* **44**, D133–D143 (2016).
- 5 4. Covert, M. W., Knight, E. M., Reed, J. L., Herrgard, M. J. & Palsson, B. O. Integrating high-throughput and computational data elucidates bacterial networks. *Nature* **429**, 92–96 (2004).
- 7 5. Martínez-Antonio, A., Collado-Vides, J., Martínez-Antonio, A. & Collado-Vides, J. Identifying global regulators in transcriptional regulatory networks in bacteria. *Curr. Opin. Microbiol.* **6**, 482–489 (2003).
- 9 6. Shen-Orr, S. S., Milo, R., Mangan, S. & Alon, U. Network motifs in the transcriptional regulation network of *Escherichia coli*. *Nat. Genet.* **31**, 64–68 (2002).
- 11 7. Shimada, T., Fujita, N., Maeda, M. & Ishihama, A. Systematic search for the Cra-binding promoters using genomic SELEX system. *Genes to Cells* **10**, 907–918 (2005).
- 13 8. Land, M. *et al.* Insights from 20 years of bacterial genome sequencing. *Funct. Integr. Genomics* **15**, 141–61 (2015).
- 15 9. Locey, K. J. & Lennon, J. T. Scaling laws predict global microbial diversity. *Proc. Natl. Acad. Sci.* **113**, 5970–5975 (2016).
- 17 10. Handelsman, J., Rondon, M. R., Brady, S. F., Clardy, J. & Goodman, R. M. Molecular biological access to the chemistry of unknown soil microbes: a new frontier for natural products. *Chem. Biol.* **5**, R245–R249 (1998).
- 20 11. Amann, R. I., Ludwig, W. & Schleifer, K. H. Phylogenetic identification and in situ detection of individual microbial cells without cultivation. *Microbiol. Rev.* **59**, 143–69 (1995).
- 22 12. Venter, J. C. Environmental Genome Shotgun Sequencing of the Sargasso Sea. *Science (80-. )*. **304**, 66–74 (2004).
- 24 13. Torsvik, V. & Øvreås, L. Microbial diversity and function in soil: from genes to ecosystems. *Curr. Opin. Microbiol.* **5**, 240–5 (2002).
- 26 14. Tringe, S. G. Comparative Metagenomics of Microbial Communities. *Science (80-. )*. **308**, 554–557 (2005).
- 27 15. Singh, J. *et al.* Metagenomics: Concept, methodology, ecological inference and recent advances. *Biotechnol. J.* **4**, 480–494 (2009).
- 29 16. Cowan, D. *et al.* Metagenomic gene discovery: past, present and future. *Trends Biotechnol.* **23**, 321–329 (2005).
- 31 17. Li, X. & Qin, L. Metagenomics-based drug discovery and marine microbial diversity. *Trends Biotechnol.* **23**, 539–543 (2005).
- 33 18. Guazzaroni, M. E., Morgante, V., Mirete, S. & González-Pastor, J. E. Novel acid resistance genes from the metagenome of the Tinto River, an extremely acidic environment. *Environ. Microbiol.* **15**, 1088–1102 (2013).
- 36 19. Uchiyama, T., Abe, T., Ikemura, T. & Watanabe, K. Substrate-induced gene-expression screening of environmental metagenome libraries for isolation of catabolic genes. *Nat. Biotechnol.* **23**, 88–93 (2005).
- 38 20. Uchiyama, T. & Miyazaki, K. Product-Induced Gene Expression, a Product-Responsive Reporter Assay Used To Screen Metagenomic Libraries for Enzyme-Encoding Genes. *Appl. Environ. Microbiol.* **76**, 7029–7035 (2010).
- 41 21. Williamson, L. L. *et al.* Intracellular Screen To Identify Metagenomic Clones That Induce or Inhibit a Quorum-Sensing Biosensor. *Appl. Environ. Microbiol.* **71**, 6335–6344 (2005).
- 42

- 1 22. Han, S. S., Lee, J. Y., Kim, W. H., Shin, H. J. & Kim, G. J. Screening of promoters from metagenomic DNA  
2 and their use for the construction of expression vectors. *J. Microbiol. Biotechnol.* **18**, 1634–1640 (2008).
- 3 23. Guazzaroni, M.-E., Silva-Rocha, R. & Ward, R. J. Synthetic biology approaches to improve biocatalyst  
4 identification in metagenomic library screening. *Microb. Biotechnol.* **8**, 52–64 (2015).
- 5 24. Ekkers, D. M., Cretoiu, M. S., Kielak, A. M. & van Elsas, J. D. The great screen anomaly—a new frontier  
6 in product discovery through functional metagenomics. *Appl. Microbiol. Biotechnol.* **93**, 1005–1020 (2012).
- 7 25. Vester, J. K., Glaring, M. A. & Stougaard, P. Improved cultivation and metagenomics as new tools for  
8 bioprospecting in cold environments. *Extremophiles* **19**, 17–29 (2015).
- 9 26. Silander, O. K. *et al.* A genome-wide analysis of promoter-mediated phenotypic noise in *Escherichia coli*.  
10 *PLoS Genet.* **8**, (2012).
- 11 27. Silva-Rocha, R. & de Lorenzo, V. Mining logic gates in prokaryotic transcriptional regulation networks.  
12 *FEBS Lett.* **582**, 1237–1244 (2008).
- 13 28. Boyle, P. M. & Silver, P. A. Harnessing nature's toolbox: regulatory elements for synthetic biology. *J. R.*  
14 *Soc. Interface* **6**, S535–S546 (2009).
- 15 29. Blount, B. A., Weenink, T., Vasylechko, S. & Ellis, T. Rational Diversification of a Promoter Providing Fine-  
16 Tuned Expression and Orthogonal Regulation for Synthetic Biology. *PLoS One* **7**, e33279 (2012).
- 17 30. Kubota, M., Yamazaki, Y. & Ishihama, A. Random screening of promoters from *Escherichia coli* and  
18 classification based on the promoter strength. *Japanese J. Genet.* **66**, 399–409 (1991).
- 19 31. Dunn, A. K. & Handelsman, J. A vector for promoter trapping in *Bacillus cereus*. *Gene* **226**, 297–305  
20 (1999).
- 21 32. Lu, C., Bentley, W. E. & Rao, G. A High-Throughput Approach to Promoter Study Using Green Fluorescent  
22 Protein. *Biotechnol. Prog.* **20**, 1634–1640 (2004).
- 23 33. Chen, S., Bagdasarian, M., Kaufman, M. G. & Walker, E. D. Characterization of Strong Promoters from an  
24 Environmental *Flavobacterium hibernum* Strain by Using a Green Fluorescent Protein-Based Reporter  
25 System. *Appl. Environ. Microbiol.* **73**, 1089–1100 (2007).
- 26 34. Mao, X., Zhang, H., Yin, Y. & Xu, Y. The percentage of bacterial genes on leading versus lagging strands  
27 is influenced by multiple balancing forces. *Nucleic Acids Res.* **40**, 8210–8218 (2012).
- 28 35. Mao, X. *et al.* Revisiting operons: an analysis of the landscape of transcriptional units in *E. coli*. *BMC*  
29 *Bioinformatics* **16**, 356 (2015).
- 30 36. Guazzaroni, M.-E. & Silva-Rocha, R. Expanding the Logic of Bacterial Promoters Using Engineered  
31 Overlapping Operators for Global Regulators. *ACS Synth. Biol.* **3**, 666–675 (2014).
- 32 37. Jiménez, D. J., Montaña, J. S., Álvarez, D. & Baena, S. A novel cold active esterase derived from  
33 Colombian high Andean forest soil metagenome. *World J. Microbiol. Biotechnol.* **28**, 361–370 (2012).
- 34 38. Pushpam, P., Rajesh, T. & Gunasekaran, P. Identification and characterization of alkaline serine protease  
35 from goat skin surface metagenome. *AMB Express* **1**, 3 (2011).
- 36 39. Gabor, E. M., de Vries, E. J. & Janssen, D. B. Construction, characterization, and use of small-insert gene  
37 banks of DNA isolated from soil and enrichment cultures for the recovery of novel amidases. *Environ.*  
38 *Microbiol.* **6**, 948–958 (2004).
- 39 40. Hebisch, E., Knebel, J., Landsberg, J., Frey, E. & Leisner, M. High Variation of Fluorescence Protein  
40 Maturation Times in Closely Related *Escherichia coli* Strains. *PLoS One* **8**, e75991 (2013).
- 41 41. Andersen, J. B. *et al.* New unstable variants of green fluorescent protein for studies of transient gene  
42 expression in bacteria. *Appl. Environ. Microbiol.* **64**, 2240–2246 (1998).

- 1 42. Frias-Lopez, J. *et al.* Microbial community gene expression in ocean surface waters. *Proc. Natl. Acad. Sci.*  
2 **105**, 3805–3810 (2008).
- 3 43. Dupont, C. L. *et al.* Genomes and gene expression across light and productivity gradients in eastern  
4 subtropical Pacific microbial communities. *ISME J.* **9**, 1076–92 (2015).
- 5 44. Fortunato, C. S. & Crump, B. C. Microbial gene abundance and expression patterns across a river to ocean  
6 salinity gradient. *PLoS One* **10**, 1–22 (2015).
- 7 45. Stewart, F. J., Ulloa, O. & Delong, E. F. Microbial metatranscriptomics in a permanent marine oxygen  
8 minimum zone. *Environ. Microbiol.* **14**, 23–40 (2012).
- 9 46. Koonin, E. V. Evolution of genome architecture. *Int. J. Biochem. Cell Biol.* **41**, 298–306 (2009).
- 10 47. Serres, M. H. & Riley, M. MultiFun, a Multifunctional Classification Scheme for Escherichia coli K-12 Gene  
11 Products. *Microb. Comp. Genomics* **5**, 205–222 (2000).
- 12 48. Bohlin, J. *et al.* Analysis of intra-genomic GC content homogeneity within prokaryotes. *BMC Genomics* **11**,  
13 464 (2010).
- 14 49. Mann, S. & Chen, Y. P. P. Bacterial genomic G + C composition-eliciting environmental adaptation.  
15 *Genomics* **95**, 7–15 (2010).
- 16 50. Foerster, K. U., von Mering, C., Hooper, S. D. & Bork, P. Environments shape the nucleotide composition  
17 of genomes. *EMBO Rep.* **6**, 1208–13 (2005).
- 18 51. Fierer, N. *et al.* Cross-biome metagenomic analyses of soil microbial communities and their functional  
19 attributes. *Proc. Natl. Acad. Sci.* **109**, 21390–21395 (2012).
- 20 52. Fierer, N., Bradford, M. A. & Jackson, R. B. Toward an ecological classification of soil bacteria. *Ecology*  
21 **88**, 1354–1364 (2007).
- 22 53. Janssen, P. H. Identifying the Dominant Soil Bacterial Taxa in Libraries of 16S rRNA and 16S rRNA Genes  
23 MINIREVIEWS Identifying the Dominant Soil Bacterial Taxa in Libraries of 16S rRNA and 16S rRNA  
24 Genes. *Appl. Environ. Microbiol.* **72**, 1719–1728 (2006).
- 25 54. Solovyev, V. & Salamov, A. in *Metagenomics and its Applications in Agriculture, Biomedicine and*  
26 *Environmental Studies* (ed. R.W., L.) 61–78 (Nova Science Publishers, 2011).
- 27 55. Gruber, T. M. & Gross, C. A. Multiple Sigma Subunits and the Partitioning of Bacterial Transcription Space.  
28 *Annu. Rev. Microbiol.* **57**, 441–466 (2003).
- 29 56. Paget, M. S. B. & Helmann, J. D. The sigma70 family of sigma factors. *Genome Biol.* **4**, 203 (2003).
- 30 57. Lonetto, M., Gribskov, M. & Gross, C. A. The sigma 70 family: sequence conservation and evolutionary  
31 relationships. *J. Bacteriol.* **174**, 3843–9 (1992).
- 32 58. Vanet, A., Marsan, L. & Sagot, M. F. Promoter sequences and algorithmical methods for identifying them.  
33 *Res. Microbiol.* **150**, 779–799 (1999).
- 34 59. de Jong, A., Pietersma, H., Cordes, M., Kuipers, O. P. & Kok, J. PePPER: a webserver for prediction of  
35 prokaryote promoter elements and regulons. *BMC Genomics* **13**, 299 (2012).
- 36 60. Shahmuradov, I. A., Mohamad Razali, R., Bougouffa, S., Radovanovic, A. & Bajic, V. B. bTSSfinder: a  
37 novel tool for the prediction of promoters in Cyanobacteria and *Escherichia coli*. *Bioinformatics* **33**, btw629  
38 (2016).
- 39 61. Conway, T. *et al.* Unprecedented high-resolution view of bacterial operon architecture revealed by RNA  
40 sequencing. *MBio* **5**, 1–12 (2014).
- 41 62. Cho, B.-K. *et al.* Elucidation of the transcription unit architecture of the Escherichia coli K-12 MG1655  
42 genome. *Nat. Biotechnol.* **27**, 1043–1049 (2009).

- 1 63. Gabor, E. M., Alkema, W. B. L. & Janssen, D. B. Quantifying the accessibility of the metagenome by  
2 random expression cloning techniques. *Environ. Microbiol.* **6**, 879–886 (2004).
- 3 64. Liebl, W. *et al.* Alternative hosts for functional (meta)genome analysis. *Appl. Microbiol. Biotechnol.* **98**,  
4 8099–8109 (2014).
- 5 65. Shimada, T., Yamazaki, Y., Tanaka, K. & Ishihama, A. The whole set of constitutive promoters recognized  
6 by RNA polymerase RpoD holoenzyme of Escherichia coli. *PLoS One* **9**, (2014).
- 7 66. Crooks, G. E. WebLogo: A Sequence Logo Generator. *Genome Res.* **14**, 1188–1190 (2004).
- 8 67. Mitchell, J. E. Identification and analysis of ‘extended -10’ promoters in Escherichia coli. *Nucleic Acids*  
9 *Res.* **31**, 4689–4695 (2003).
- 10 68. Keseler, I. M. *et al.* The EcoCyc database: reflecting new knowledge about Escherichia coli K-12. *Nucleic*  
11 *Acids Res.* **45**, D543–D550 (2017).
- 12 69. Rangel, C. P., Galán, E. & Martínez, A. Consensus architecture of promoters and transcription units in  
13 Escherichia coli: design principles for synthetic biology. *Mol. BioSyst.* (2017). doi:10.1039/C6MB00789A
- 14 70. Mao, X. *et al.* DOOR 2.0: presenting operons and their functions through dynamic and integrated views.  
15 *Nucleic Acids Res.* **42**, D654–D659 (2014).
- 16 71. Chang, D. E., Smalley, D. J. & Conway, T. Gene expression profiling of Escherichia coli growth transitions:  
17 An expanded stringent response model. *Mol. Microbiol.* **45**, 289–306 (2002).
- 18 72. Bernstein, J. R., Bulter, T., Shen, C. R. & Liao, J. C. Directed Evolution of Ribosomal Protein S1 for  
19 Enhanced Translational Efficiency of High GC Rhodospseudomonas palustris DNA in Escherichia coli. *J.*  
20 *Biol. Chem.* **282**, 18929–18936 (2007).
- 21 73. Fernandez, L., Mercader, J. M., Planas-Fèlix, M. & Torrents, D. Adaptation to environmental factors shapes  
22 the organization of regulatory regions in microbial communities. *BMC Genomics* **15**, 877 (2014).
- 23 74. Solé, R. Bioengineering the biosphere? *Ecol. Complex.* **22**, 40–49 (2015).
- 24 75. Johns, N. I., Blazejewski, T., Gomes, A. L. & Wang, H. H. Principles for designing synthetic microbial  
25 communities. *Curr. Opin. Microbiol.* **31**, 146–153 (2016).
- 26 76. Fredrickson, J. K. Ecological communities by design. *Science (80-. ).* **348**, 1425–1427 (2015).
- 27 77. Lämmle, K. *et al.* Identification of novel enzymes with different hydrolytic activities by metagenome  
28 expression cloning. *J. Biotechnol.* **127**, 575–592 (2007).
- 29 78. Gaida, S. M. *et al.* Expression of heterologous sigma factors enables functional screening of metagenomic  
30 and heterologous genomic libraries. *Nat. Commun.* **6**, 7045 (2015).
- 31 79. Sambrook, J.; Fritsch, E. F.; Maniatis, T. *Molecular cloning: a laboratory manual.* (Cold Spring Harbor  
32 Laboratory Press, 1989).
- 33 80. Kelly, J. R. *et al.* Measuring the activity of BioBrick promoters using an in vivo reference standard. *J. Biol.*  
34 *Eng.* **3**, 4 (2009).
- 35 81. Raes, J., Korbøl, J. O., Lercher, M. J., von Mering, C. & Bork, P. Prediction of effective genome size in  
36 metagenomic samples. *Genome Biol.* **8**, R10 (2007).
- 37

## 38 Acknowledgements

1 This work was supported by the National Council for Technological and Scientific Development (CNPq  
2 472893/2013-0 and 441833/2014-4) and by Young Research Awards by the Sao Paulo State Foundation  
3 (FAPESP, award numbers 2015/04309-1 and 2012/21922-8). CAW and LFA are beneficiaries of FAPESP  
4 fellowships (award numbers 2016/05472-6 and 2016/06323-4, respectively). Authors have no conflict of interest  
5 to declare.

## 6 **Author Contributions**

7 CAW, LFA, MEG and RSR designed the experiments. CAW and LFA performed the experiments. CAW analyzed  
8 the data. CAW and RSR prepared the figures. CAW and MEG wrote the manuscript. All authors reviewed the  
9 manuscript.

10

## 11 **Additional Information**

### 12 **Competing financial interests**

13 The author(s) declare no competing financial interests.

14

## 15 **Tables and figures**

16

17 **Table 1.** Features of the generated metagenomic libraries.

| Metagenomic Library                          | USP 1       | USP 3       |
|----------------------------------------------|-------------|-------------|
| Total number of clones                       | 100,000     | 90,000      |
| Percentage of clones with insert             | 60%         | 70%         |
| Number of clones with insert                 | 60,000      | 63,000      |
| Total number and rate* of fluorescent clones | 400 (1:150) | 700 (1:90)  |
| Total number and rate* of green clones       | 270 (1:220) | 400 (1:157) |
| Total number and rate* of red clones         | 130 (1:460) | 300 (1:210) |
| Average insert size                          | 4,5 kb      | 3,7 kb      |
| Library Size                                 | 270 Mb      | 233 Mb      |
| Estimated number of genomes**                | 60          | 52          |

18

19 \* Rate represented by the number of fluorescent clones divided by the total number of clones with inserts.

20 \*\* Assuming 4.5 Mb per genome <sup>81</sup>.

21

22

1 **Table 2.** Description of the ORFs contained in plasmids from the selected clones (pCAW1 to pCAW10) and their  
 2 sequence similarities.

3

| Clone_Sample [insert bp] | % G + C | GenBank accession No. | ORF <sup>a</sup> | Strand | Length (aa <sup>b</sup> ) | Closest similar protein <sup>c</sup> (Length in aa) | Organism                                           | Identity (%) | Putative function                   |
|--------------------------|---------|-----------------------|------------------|--------|---------------------------|-----------------------------------------------------|----------------------------------------------------|--------------|-------------------------------------|
| pCAW1 (2367bp)           | 55%     | KY939589              | 1                | Minus  | 131                       | hypothetical protein (416)                          | Bacterioidetes bacterium                           | 68%          | Alginate lyase                      |
|                          |         |                       | 2                | Plus   | 271                       | hypothetical protein (261)                          | Acidobacteria bacterium                            | 73%          | 17-B-hydroxysteroid dehydrogenase   |
|                          |         |                       | 3 <sup>a</sup>   | Plus   | 295                       | beta-glucosidase (777)                              | Caulobacter sp. OV484                              | 66%          | beta-glucosidase                    |
| pCAW2 (2069bp)           | 52%     | KY939590              | 1                | Plus   | 304                       | Unkonwn <sup>c</sup>                                | Hyphomicrobium sp. NDB2Meth4                       | 33%          | Unknown                             |
|                          |         |                       | 2                | Plus   | 249                       | Unkonwn                                             | Hungatella hathewayi                               | 33%          | Unknown                             |
| pCAW3 (4404bp)           | 53%     | KY939591              | 1                | Minus  | 318                       | IS4 family transposase (320)                        | Escherichia coli                                   | 96%          | IS4 family transposase              |
|                          |         |                       | 2                | Minus  | 1011                      | DNA-directed RNA polymerase subunit beta' (1430)    | Sphingobacteriales bacterium 44-61                 | 83%          | RNA polymerase - Beta Subunit       |
|                          |         |                       | 3                | Plus   | 120                       | Uncharacterised protein (135)                       | Bordetella pertussis                               | 47%          | Unknown                             |
|                          |         |                       | 4                | Plus   | 151                       | Uncharacterised protein (130)                       | Bordetella pertussis                               | 37%          | Unknown                             |
|                          |         |                       | 5                | Plus   | 94                        | Uncharacterised protein (64)                        | Bordetella pertussis                               | 82%          | Unknown                             |
|                          |         |                       | 6                | Plus   | 96                        | Uncharacterised protein (86)                        | Vibrio cholerae                                    | 48%          | Unknown                             |
|                          |         |                       | 7                | Plus   | 173                       | predicted protein (585)                             | Ruminococcus sp. CAG:403                           | 26%          | Unknown                             |
| pCAW4 (4002bp)           | 61%     | KY939592              | 1                | Minus  | 245                       | nosine monophosphate cyclohydrolase (246)           | Ktedonobacter racemifer                            | 63%          | IMP cyclohydrolase                  |
|                          |         |                       | 2                | Minus  | 214                       | phosphodiesterase (498)                             | candidate division NC10 bacterium                  | 40%          | phosphodiesterase                   |
|                          |         |                       | 3                | Minus  | 402                       | hypothetical protein A2Y08_02680 (625)              | Planctomycetes bacterium GWA2_40_7                 | 43%          | Unknown                             |
|                          |         |                       | 4 <sup>a</sup>   | Plus   | 142                       | gentisate 1,2-dioxygenase (349)                     | Pseudomonas sp. 21C1                               | 60%          | gentisate 1,2-dioxygenase           |
| pCAW5 (2724bp)           | 54%     | KY939593              | 1 <sup>a</sup>   | Plus   | 642                       | pyruvate:ferredoxin oxidoreductase (1565)           | uncultured bacterium HF770_11D24] / Acidobacterium | 80%          | pyruvate:ferredoxin oxidoreductase  |
| pCAW6 (2125bp)           | 57%     | KY939594              | 1                | Plus   | 159                       | hypothetical protein BGO39_33875 (215)              | Chloroflexi bacterium 54-19                        | 65%          | MerR family                         |
|                          |         |                       | 2                | Plus   | 336                       | hypothetical protein BGO39_33870 (347)              | Chloroflexi bacterium 54-19                        | 78%          | PrsW intramembrane metalloprotease  |
|                          |         |                       | 3 <sup>a</sup>   | Plus   | 163                       | hypothetical protein BGO39_33865 (173)              | Chloroflexi bacterium 54-19                        | 75%          | chromate transporter                |
| pCAW7 (2558bp)           | 46%     | KY939595              | 1 <sup>a</sup>   | Minus  | 391                       | hypothetical protein A2X07_06330 (480)              | Flavobacteria bacterium GWF1_32_7                  | 45%          | Por secretion system sorting domain |
|                          |         |                       | 2                | Minus  | 250                       | hypothetical protein (586)                          | Chitinophagaceae bacterium PMP191F                 | 65%          | Polysaccharide Lyase                |
| pCAW8 (4480bp)           | 57%     | KY939596              | 1                | Plus   | 508                       | hypothetical protein AUH20_02325 (597)              | Rokubacteria bacterium                             | 76%          | 5-oxoprolinase / Hydantoinase_B     |
|                          |         |                       | 2                | Minus  | 348                       | Oxidoreductase (336)                                | Rokubacteria bacterium                             | 61%          | Flavin-utilizing monooxygenases     |
|                          |         |                       | 3                | Plus   | 314                       | hypothetical protein ETSY1_46935 (279)              | Candidatus Entotheonella sp. TSY1                  | 76%          | Cellulose biosynthesis BcsQ         |
| pCAW9 (2573bp)           | 43%     | KY939597              | 1 <sup>a</sup>   | Minus  | 81                        | hypothetical protein (129)                          | Janthinobacterium                                  | 50%          | Unknown                             |
|                          |         |                       | 2                | Minus  | 303                       | Formylglycine-generating enzyme (379)               | Mucilagibacter sp.                                 | 65%          | Formylglycine-generating enzyme     |
|                          |         |                       | 3                | Minus  | 457                       | acetylglucosamine-6-sulfatase (504)                 | Flaviumibacter solisilvae                          | 67%          | acetylglucosamine-6-sulfatase       |

|                 |     |                                             |   |      |     |                       |         |                        |     |         |
|-----------------|-----|---------------------------------------------|---|------|-----|-----------------------|---------|------------------------|-----|---------|
| pCAW10 (2076bp) | 56% | Submitted -<br>Waiting for<br>accession no. | 1 | Plus | 204 | hypothetical<br>(195) | protein | Luminiphilus sylvensis | 50% | Unknown |
|-----------------|-----|---------------------------------------------|---|------|-----|-----------------------|---------|------------------------|-----|---------|

1 <sup>a</sup>Truncated proteins.

2 <sup>b</sup>aa, amino acids.

3 <sup>c</sup>Sequences with an *E*-value higher than 0.001 in Blastp searches were considered to be unknown proteins.

4

5

6

7

8

9

10 **Figures**

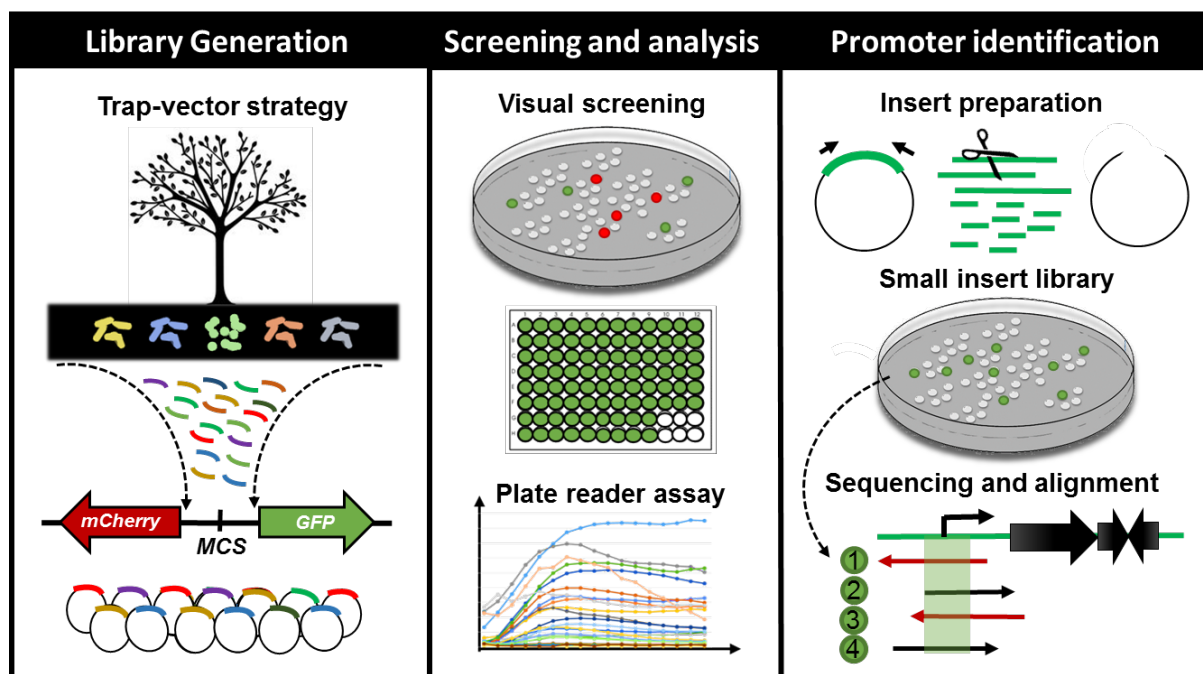

11

12 **Figure 1. Schematic representation of the workflow for finding, characterising and cross-validating novel**  
 13 **bacterial cis-regulatory elements in environmental samples.** From left to right: firstly, we have generated  
 14 metagenomic libraries from soil samples in *E. coli* DH10B. The DNA fragments were cloned into a bi-directional  
 15 reporter trap-vector (bearing *mCherry* and *GFP* fluorescent reporters), pMR1, which allowed for the screening  
 16 of promoters in both DNA strands. Secondly, we have manually screened all visible fluorescent clones from our  
 17 metagenomic libraries and analysed the expression patterns of all green fluorescent clones on a microplate reader  
 18 during 8 hours. Lastly, we have selected ten clones based on their *GFP* expression patterns for an in-depth  
 19 analysis combining experimental (small DNA insert library generation) and *in silico* promoter prediction. This  
 20 integrated strategy has allowed us to identify, validate and estimate the accessibility of novel promoter regions  
 21 from metagenomic libraries.

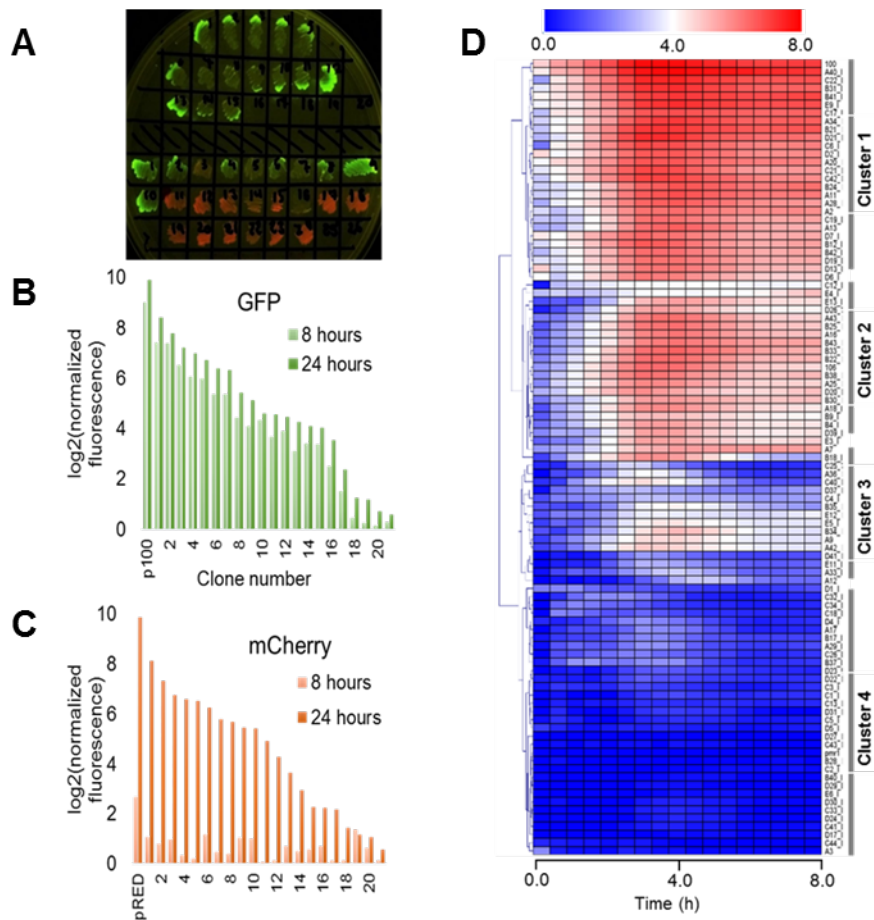

1

2 **Figure 2. Evaluating the expression dynamics of fluorescent clones.** A) LB-agar plate under blue light  
3 light excitation comprising a subset of metagenomic isolated clones expressing GFP<sub>Iva</sub> (top) and mCherry (bottom)  
4 fluorescent reporters. A few clones were observed to express both reporters. All isolated clones were initially  
5 considered to hold at least one endogenous promoter. B-C) Indirect assessment of maturation times from both  
6 fluorescent reporters GFP<sub>Iva</sub> (B) and mCherry (C) after 8 hours (light bars) and 24 hours (dark bars) of the  
7 beginning of the experiment. Maturation times are substantially lower for mCherry than for GFP<sub>Iva</sub>, which excluded  
8 the former from further analyses. Positive controls for GFP and mCherry are represented by p100 and pRED,  
9 respectively. Fluorescence data has been normalised by OD<sub>600</sub> values for each sample following normalisation by  
10 values from the negative control (empty-pMR1). Data was transformed to log<sub>2</sub> scale to allow better visualisation of  
11 fluorescence variation. D) Hierarchical representation of a metaconstitutome (i.e. all expression profiles from a  
12 single metagenomic library). Fluorescence time-lapse dynamics were measured during 8 hours for each clone and  
13 represented as heat maps. Promoter activities (calculated as GFP/OD<sub>600</sub>) were normalised by the negative control  
14 (*E. coli* DH10B harbouring empty pMR1) and transformed to log<sub>2</sub> scale in order to facilitate the visualisation of  
15 subtle activities. Data are representative of three independent experiments.



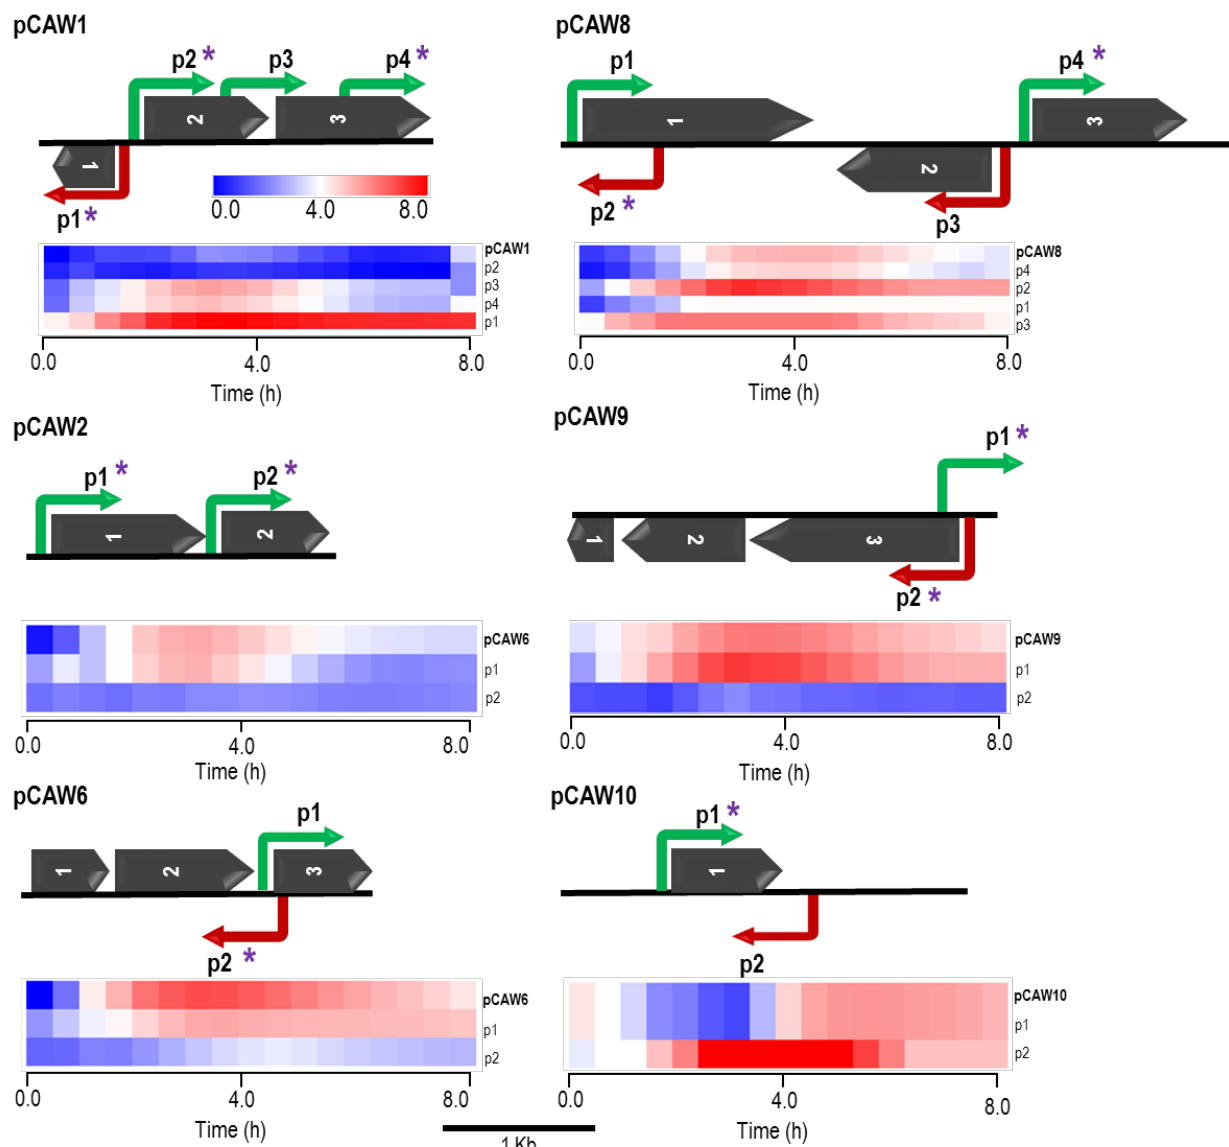

1

2 **Figure 3. Schematic representation of six metagenomic inserts (contigs) showing predicted ORFs and**  
 3 **experimentally validated/characterised promoters.** Each contig is identified on the far left of each subfigure.  
 4 Promoters are indicated by elbow-shaped arrows and name according to their relative position in the contig.  
 5 Promoter directionality, regarding the leading and lagging strands, is represented by green and red colours,  
 6 respectively. Asterisks over specific promoters indicate regulatory regions which were cross-validated by matching  
 7 *in silico* predictions. Dark arrows represent predicted ORFs, according to their relative positions in each contig (see  
 8 Table 2 for more information). All genetic features respect their original relative sizes, following the 1 Kb scale  
 9 depicted at the bottom of this figure. Beneath each metagenomic insert, there is a heat map cluster representing  
 10 the whole set of promoter activities measured during 8-hours fluorescence assays. The first line of each cluster  
 11 shows the original expression profile initially measured for each metagenomic insert. All other lines represent  
 12 expression activities from *de novo* experimentally validated promoters within each contig (small DNA fragments).  
 13 The second line of each cluster represents the endogenous promoter showing the most similar activity with respect  
 14 to the original expression profile for each contig. All expression profiles are properly identified at the most rightmost  
 15 side of each line, following their respective contig/promoter name. For the supplementary set of analysed contigs,  
 16 see Supplementary Figure S4 online.

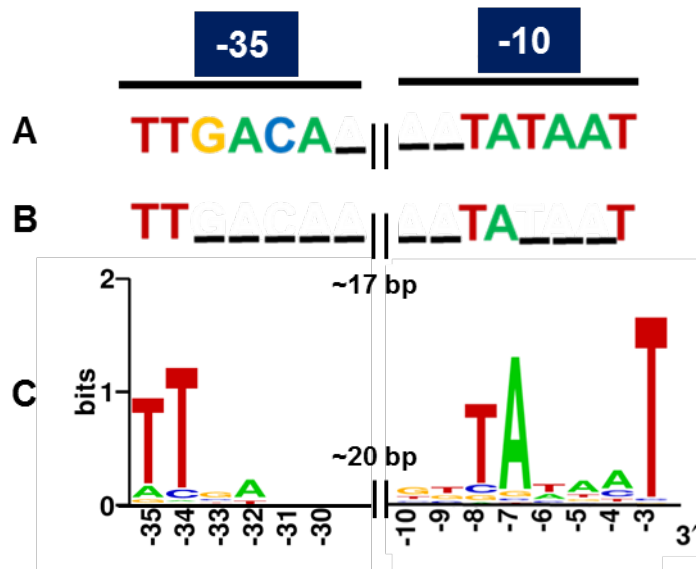

1

2 **Figure 4. Consensus of RpoD-related metagenomic promoters.** A) Known consensus sequences of the RpoD-  
3 dependent promoter determined in vitro, TTGAAC (-35) and TATAAT (-10) separated by 17 plus/minus 2 bp in E.  
4 coli <sup>65</sup>. B) Known consensus sequences of 582 promoters experimentally validated in E. coli <sup>3,65,68</sup>. C) The  
5 sequences of the 33 promoters experimentally validated in this study were aligned and subjected to Logo analysis  
6 <sup>66</sup>. The consensus from the metagenomic set (C) is very similar to the one from the experimentally validated set  
7 from E. coli (B).
